# Supplementary material
Source: publisher figshare collection journal article supplement (https://diabetesjournals.figshare.com/articles/dataset/_/17004046)
Supplement: Supplementary file 1 [file 1]

## **Table of contents for the supplementary materials**

**Supplementary Material 1.** Results from Tests of Proportional Hazard Assumption in the Complete-Case and Multiply Imputed Datasets (csv)

### **Supplementary Material 2.**

1. Supplementary Procedures
  - a. Covariate Measurement
  - b. Multiple Imputation
  - c. Steps/Day-Diabetes Mediation Analysis of Body Mass Index
2. Supplementary Table 1 – Baseline (2012-2014) Characteristics in OPACH Participants of those Included and Excluded in Analytic Sample
3. Supplementary Table 2 – Comparison of Results from the Multiply Imputed (MI) Data and the Complete-Case Analysis: Associations between Steps/day and Incident Diabetes Among Older Women who had Accelerometry during 2012-2014 and Follow-up through February 28, 2020
4. Supplementary Table 3 – Complete-Case Analysis: Associations between Light and MV Steps/Day and Incident Diabetes Among Older Women who had Accelerometry during 2012-2014 and Follow-up through February 28, 2020 (n=4,437; events=355)
5. Supplementary Table 4 – Associations between Step Cadence Measures and Incident Diabetes Among Older Women who had Accelerometry during 2012-2014 and Follow-up through February 28, 2020; (n=4,838, events=395)
6. Supplementary Table 5 – Sensitivity Analysis: Hazard Ratios for Incident Diabetes from Adjusted Cox Regression Models after Removal of Women with High Fasting Glucose, or Diabetes Onset within 2 Years of Baseline Among Older Women who had Accelerometry during 2012-2014 and Follow-up through February 28, 2020
7. Supplementary Table 6 – Association between Steps/day and Incident Diabetes Among Older Women who had Accelerometry during 2012-2014 and Follow-up through February 28, 2020; (n=4,838; diabetes cases=395)

**Supplementary Material 1. Results from Tests of Proportional Hazard Assumption in the Complete-Case and Multiply Imputed Datasets.** Supplementary Material #1 is provided as a csv file with the chi-square and p-values of every covariate in each of the 50 versions of the imputed datasets for the primary steps/day model.

## **Supplementary Material 2**

### **Supplementary Procedures: Covariate Measurement**

#### Covariates

Participants completed questionnaires during enrollment on age, race-ethnicity, and education. Family history of diabetes was assessed by asking, “Did your mother or father, or full-blooded sisters, full-blooded brothers, daughters, or sons ever have sugar diabetes or high blood sugar that first appeared as an adult?” Subsequent questionnaires around the time of accelerometry were used to assess alcohol consumption, current smoking status, general health status, and physical functioning (RAND 36-Item Health Survey). Health status prior to the OPACH study has been extensively characterized from the WHI baseline (1993 through 1998), enabling adjustment for multimorbidity. Multimorbidity was the number of chronic health conditions at the time of accelerometry (cardiovascular disease; cancer; cognitive impairment; depression; osteoarthritis; history of frequent falls; chronic obstructive pulmonary disease, hypertension; cerebrovascular disease). Diagnostic criteria for each of these chronic conditions have been previously defined [1]. At the WHI Long Life Study (2012-2013) home visit immediately before accelerometer wear, trained technicians measured height and weight, which was then used to calculate body mass index (BMI;  $\text{kg/m}^2$ ). Phlebotomy was conducted on all women when not contraindicated, from which fasting blood glucose was obtained: a total of 79% of OPACH participants had successful phlebotomy ( $n=3831$ ) [2].

### **Supplementary Procedures: Multiple Imputation**

Multiple imputation (mice package) was performed using 50 rounds of imputation over 5 iterations, and all models were executed using multiple imputation to avoid inducing selection bias by otherwise restricting to those with complete data. Our multiple imputation model included all independent variables, in addition to covariates that we adjusted for. We did not investigate additional auxiliary variables, since the multiple imputation model already included confounding covariates of the steps-diabetes association among older adults. The procedure used for imputation varied depending on the data type of the variable for which we were performing imputation. For continuous variables (e.g., physical function score), we used predictive mean matching. For binary categorical variables (e.g., family history of diabetes), we imputed these values using logistic regression. For categorical variables with multiple categories (e.g., overall health category), we used polychotomous logistic regression.

### **Supplementary Procedures: Steps/Day-Diabetes Mediation Analysis of Body Mass Index**

Accelerated failure time models were modeled using an exponential distribution with the “mediation” package in R [3] to estimate the proportion of the steps/d and diabetes risk mediated through BMI. Specifically, 5,000 quasi-Bayesian Monte Carlo simulations were run based on normal approximation [4] with control and treatment values of steps/d set at the 25th and 75th percentile of steps, respectively. Robust standard errors were computed using White’s heteroskedasticity-consistent estimator for the covariance matrix from the “sandwich” package [5].

**Supplementary Table 1** – Baseline (2012-2014) Characteristics in OPACH Participants of those Included and Excluded in Analytic Sample

|                                                | Missing in<br>Analytic<br>Sample n,<br>(%) | Included in<br>Analytic Sample<br>(n=4838) | Excluded from<br>Analytic Sample<br>(n=183)† | p-<br>values |
|------------------------------------------------|--------------------------------------------|--------------------------------------------|----------------------------------------------|--------------|
| Age, yrs.; <i>mean (sd)</i>                    | 0 (0)                                      | 78.92 (6.73)                               | 78.68 (6.59)                                 | 0.63         |
| Age Groups; % ≥80 Years                        | 0 (0)                                      | 2487 (51.4)                                | 87 (47.5)                                    | 0.34         |
| Race-ethnicity; %                              | 0 (0)                                      |                                            |                                              | 0.16         |
| White                                          |                                            | 2568 (53.1)                                | 84 (45.9)                                    |              |
| Black                                          |                                            | 1469 (30.4)                                | 63 (34.4)                                    |              |
| Hispanic                                       |                                            | 801 (16.6)                                 | 36 (19.7)                                    |              |
| Education; %                                   | 31 (0.6)                                   |                                            |                                              | 0.68         |
| High School/GED                                |                                            | 951 (19.8)                                 | 31 (17.1)                                    |              |
| Some College                                   |                                            | 1817 (37.8)                                | 71 (39.2)                                    |              |
| College Graduate+                              |                                            | 2039 (42.4)                                | 79 (43.6)                                    |              |
| Self-Rated Health; %                           | 16 (0.3)                                   |                                            |                                              | 0.44         |
| Excel./Very Good                               |                                            | 2633 (54.6)                                | 92 (51.1)                                    |              |
| Good                                           |                                            | 1818 (37.7)                                | 70 (38.9)                                    |              |
| Poor/Very Poor                                 |                                            | 371 (7.7)                                  | 18 (10.0)                                    |              |
| Light Intensity Steps, steps; <i>mean (sd)</i> | 0 (0)                                      | 1875.32 (790.77)                           | 1469.69 (835.23)                             | <0.001       |
| MV Steps, steps; <i>mean (sd)</i>              | 0 (0)                                      | 1853.57 (1762.38)                          | 1228.99 (1514.39)                            | <0.001       |
| Physical Function; <i>mean (sd)</i>            | 51 (1)                                     | 70.63 (25.14)                              | 66.17 (26.79)                                | 0.02         |
| Smoker Status; %                               | 0 (0)                                      |                                            |                                              |              |
| Smoker                                         |                                            | 133 (2.7)                                  | 3 (1.6)                                      | 0.50         |
| Alcohol Frequency; %                           | 0 (0)                                      |                                            |                                              | <0.001       |
| <1 per Week                                    |                                            | 1526 (31.5)                                | 55 (30.1)                                    |              |
| ≥1 per Week                                    |                                            | 1546 (32.0)                                | 53 (29.0)                                    |              |
| Non-Drinker                                    |                                            | 1390 (28.7)                                | 43 (23.5)                                    |              |
| Unspecified                                    |                                            | 376 (7.8)                                  | 32 (17.5)                                    |              |
| Incident Diabetes; %                           | 0 (0)                                      | 395 (8.2)                                  | 17 (9.3)                                     | 0.68         |
| Family History of Diabetes; %                  | 22 (0.5)                                   | 1599 (33.2)                                | 60 (32.8)                                    | 0.97         |
| BMI, kg/m <sup>2</sup> ; <i>mean (sd)</i>      | 308 (6)                                    | 27.58 (5.43)                               | 28.15 (5.67)                                 | 0.19         |
| Glucose, mg/dL; <i>mean (sd)</i>               | 1007 (21)                                  | 92.53 (16.08)                              | 95.41 (17.21)                                | 0.32         |
| No. Comorbidities <sup>#</sup> , %             | 0 (0)                                      |                                            |                                              | 0.06         |
| Zero                                           |                                            | 548 (11.3)                                 | 15 (8.2)                                     |              |
| One                                            |                                            | 1660 (34.3)                                | 63 (34.4)                                    |              |
| Two                                            |                                            | 1719 (35.5)                                | 57 (31.1)                                    |              |
| Three or More                                  |                                            | 911 (18.8)                                 | 48 (26.2)                                    |              |

Abbreviations: BMI = body mass index. sd = standard deviation. No = number

p-value: chi-squared for categorical variables and trend test for continuous.

# chronic conditions used to compute this included: cardiovascular disease; cancer; cognitive impairment; depression medication use; osteoarthritis; history of frequent falls; chronic obstructive pulmonary disease, hypertension; cerebrovascular disease.

†Note, a total of 183 participants “excluded from the analytic sample” were excluded based on the exclusion criteria described in the methods, except on the basis of prevalent diabetes (n=1,358) or excessive stepping (greater than 30,000 steps/day, n=3).

**Supplementary Table 2** – Comparison of Results from the Multiply Imputed (MI) Data and the Complete-Case Analysis: Associations between Steps/day and Incident Diabetes Among Older Women who had Accelerometry during 2012-2014 and Follow-up through February 28, 2020

|         | Main Analysis using MI Data<br>Steps/day, Unit=2,000 steps<br>(n=4,838; events=395) |         | Complete Case Analysis<br>Steps/day, Unit=2,000 steps<br>(n=4,437; events=355) |         |
|---------|-------------------------------------------------------------------------------------|---------|--------------------------------------------------------------------------------|---------|
|         | HR (95% CI)                                                                         | P-value | HR (95% CI)                                                                    | P-value |
| Model 1 | 0.86 (0.77-0.96)                                                                    | 0.007   | 0.86 (0.76-0.97)                                                               | 0.01    |
| Model 2 | 0.88 (0.78-1.00)                                                                    | 0.045   | 0.88 (0.78-1.00)                                                               | 0.06    |
| Model 3 | 0.90 (0.80-1.02)                                                                    | 0.11    | 0.90 (0.79-1.03)                                                               | 0.13    |

Abbreviations: HR=hazard ratio; CI=confidence interval. Model 1 (M1) is adjusted for age and race-ethnicity. Model 2 = M1 + education, self-rated health, family history of diabetes, number of chronic conditions, physical functioning (Rand-36), alcohol consumption, and current smoking status. Model 3 additionally adjusts for BMI, which we consider in the steps/day and diabetes pathway.

**Supplementary Table 3** – Complete-Case Analysis: Associations between Light and MV Steps/Day and Incident Diabetes Among Older Women who had Accelerometry during 2012-2014 and Follow-up through February 28, 2020 (n=4,437; events=355)

| Light Intensity Steps/day, Unit=2,000 steps |         | Steps/day, Unit=2,000 steps |         |
|---------------------------------------------|---------|-----------------------------|---------|
| HR (95% CI)                                 | P-value | HR (95% CI)                 | P-value |
| 0.98 (0.72-1.33)                            | 0.89    | 0.87 (0.74-1.01)            | 0.07    |

Abbreviations: HR=hazard ratio; CI=confidence interval; MV=moderate-to-vigorous. Estimates adjusted for age, race-ethnicity, education, self-rated health; family history of diabetes number of chronic conditions; physical functioning (Rand-36); alcohol consumption; and current smoking status.

**Supplementary Table 4** – Associations between Step Cadence Measures and Incident Diabetes Among Older Women who had Accelerometry during 2012-2014 and Follow-up through February 28, 2020; (n=4,838, events=395)

|                                                                                            | HR (95% CI)      | P-value |
|--------------------------------------------------------------------------------------------|------------------|---------|
| Peak 30-minute cadence,<br>per 20 steps/min increment                                      | 0.91 (0.81-1.02) | 0.09    |
| Percentile of Time at greater<br>than 40 steps per minute,<br>per one percentile increment | 0.95 (0.89-1.02) | 0.13    |
| Total Steps Accumulated in<br>Bouts, per 200 steps<br>increment                            | 0.99 (0.97-1.01) | 0.22    |

Estimates adjusted for age, race-ethnicity, education, self-rated health; family history of diabetes number of chronic conditions; physical functioning (Rand-36); alcohol consumption; and current smoking status.

**Supplementary Table 5** – Sensitivity Analysis: Hazard Ratios for Incident Diabetes from Adjusted Cox Regression Models after Removal of Women with High Fasting Glucose, or Diabetes Onset within 2 Years of Baseline Among Older Women who had Accelerometry during 2012-2014 and Follow-up through February 28, 2020

|         | Removal of Individuals with Diabetes Onset<br>with High Fasting Glucose Levels<br>Steps/day (n=4,668; events=358) |         | Removal of Individuals with Diabetes Onset<br>within 2 Years of Baseline<br>Steps/day (n=4,717; events=274) |         |
|---------|-------------------------------------------------------------------------------------------------------------------|---------|-------------------------------------------------------------------------------------------------------------|---------|
|         | HR (95% CI)                                                                                                       | P-value | HR (95% CI)                                                                                                 | P-value |
| Model 1 | 0.87 (0.78-0.98)                                                                                                  | 0.02    | 0.89 (0.78-1.01)                                                                                            | 0.07    |
| Model 2 | 0.88 (0.78-1.00)                                                                                                  | 0.05    | 0.91 (0.79-1.05)                                                                                            | 0.22    |
| Model 3 | 0.90 (0.79-1.03)                                                                                                  | 0.12    | 0.93 (0.81-1.08)                                                                                            | 0.35    |

Model 1 (M1) is adjusted for age and ethnicity. Model 2 = M1 + education, self-reported health; family history of diabetes number of chronic conditions; physical functioning (Rand-36); alcohol consumption; and current smoking status. Model 3 additionally adjusts for BMI, which we considered to be in the steps and diabetes pathway.



**Supplementary Table 6** – Association between Steps/day and Incident Diabetes Among Older Women who had Accelerometry during 2012-2014 and Follow-up through February 28, 2020; (n=4,838; diabetes cases=395)

|                                                   | Steps per day <sup>‡</sup> Quartiles |                  |                  |                  | P-trend <sup>†</sup> |
|---------------------------------------------------|--------------------------------------|------------------|------------------|------------------|----------------------|
|                                                   | Q1                                   | Q2               | Q3               | Q4               |                      |
| Diabetes Cases<br>[Rate per 1000<br>Person-years] | 89 [16.2]                            | 120 [19.9]       | 103 [16.5]       | 83 [12.7]        |                      |
| Model 1                                           | 1.00                                 | 1.16 (0.88-1.54) | 0.94 (0.70-1.27) | 0.71 (0.51-0.98) | 0.007                |
| Model 2                                           | 1.00                                 | 1.21 (0.91-1.61) | 1.02 (0.75-1.39) | 0.78 (0.54-1.11) | 0.045                |
| Model 3                                           | 1.00                                 | 1.21 (0.91-1.61) | 1.04 (0.76-1.42) | 0.82 (0.57-1.17) | 0.11                 |

<sup>†</sup>P-values from Cox multivariable linear regression models including steps/day in models in a continuous form.

<sup>‡</sup> Steps per day is defined as quartiles, which were determined using the awake wear-time adjusted steps values.

Q1= Min to 2,337, Q2= 2,337-3,396, Q3=3,396-4,914, Q4=4,914 to Max.

Model 1 (M1) is adjusted for age and ethnicity. Model 2 = M1 + education, self-reported health; family history of diabetes number of chronic conditions; physical functioning (Rand-36); alcohol consumption; and current smoking status. Model 3 additionally adjusts for BMI, which we considered to be in the steps and diabetes pathway.

### Supplement References

1. Rillamas-Sun, E., et al., *The Impact of Multimorbidity and Coronary Disease Comorbidity on Physical Function in Women Aged 80 Years and Older: The Women's Health Initiative*. J Gerontol A Biol Sci Med Sci, 2016. **71 Suppl 1**(Suppl 1): p. S54-61.
2. LaCroix, A.Z., et al., *The Objective Physical Activity and Cardiovascular Disease Health in Older Women (OPACH) Study*. BMC Public Health, 2017. **17**(1): p. 192.
3. Tingley, D., et al., *mediation: R Package for Causal Mediation Analysis*. 2014, 2014. **59**(5): p. 38.
4. Imai, K., L. Keele, and D. Tingley, *A general approach to causal mediation analysis*. Psychol Methods, 2010. **15**(4): p. 309-34.
5. Zeileis, A., *Object-oriented Computation of Sandwich Estimators*. 2006, 2006. **16**(9): p. 16.
